# Supplementary material for: The polarized electric field of CdTe/B4C3 heterostructure efficiently promotes its photocatalytic overall water splitting
Source: Royal Society of Chemistry journal article supplement (doi:10.1039/d3cp01870a), 2023-01-01
Supplement: d3cp01870a1.pdf [file d3cp01870a1.pdf]

*Supplementary Information for*

**The polarized electric field of CdTe/B<sub>4</sub>C<sub>3</sub> heterostructure efficiently  
promote its photocatalytic Overall Water Spitting**

Minglei Jia, Fengzhu Ren<sup>†</sup>, Wenna Han, Pengyu Liu, Chao Jin, Xuefeng Chen, Chengxiao Peng, Bing Wang<sup>††</sup>

*Institute for Computational Materials Science, School of Physics and Electronics, International Joint Research Laboratory of New Energy Materials and Devices of Henan Province, Henan University, Kaifeng 475004, China.*

<sup>†</sup>email: [f.z.ren@henu.edu.cn](mailto:f.z.ren@henu.edu.cn)

<sup>††</sup>email: [wb@henu.edu.cn](mailto:wb@henu.edu.cn)

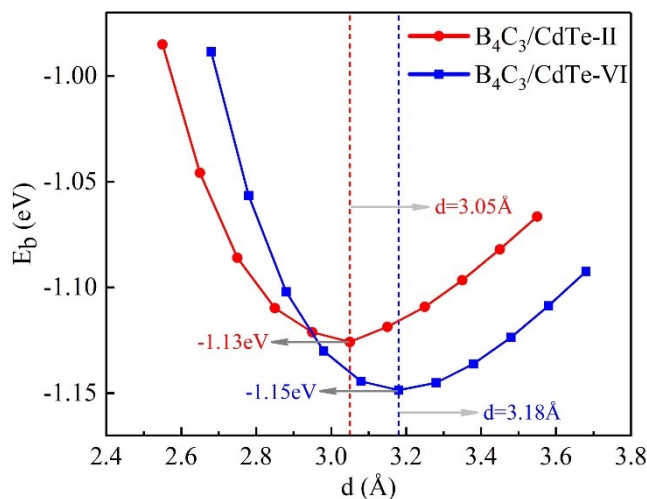

Figure S1 The  $E_b$  curve of CdTe/B<sub>4</sub>C<sub>3</sub>-II and CdTe/B<sub>4</sub>C<sub>3</sub>-V heterostructures as function of interlayer distance  $d$ .

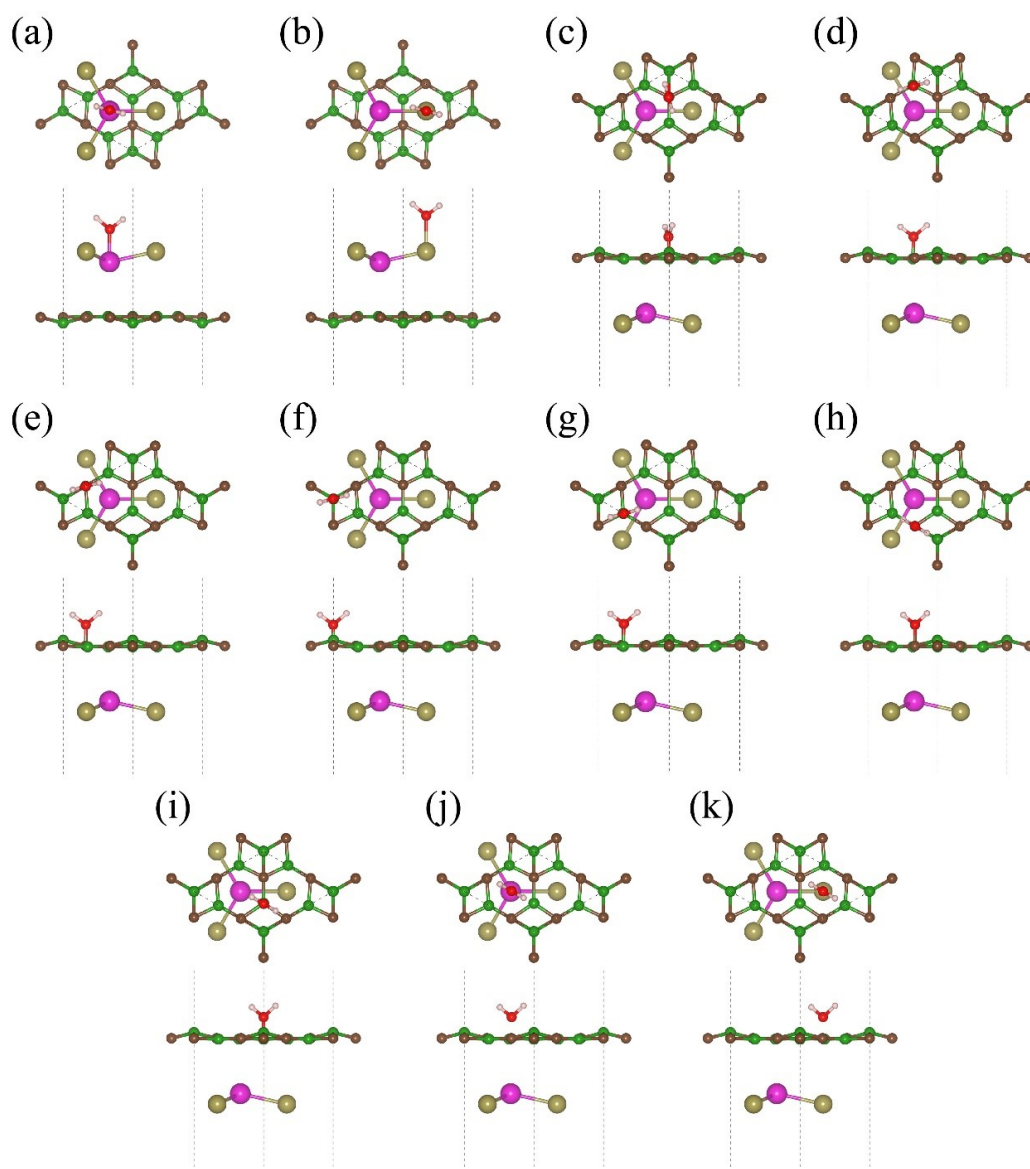

Figure S2 The adsorption configurations of H<sub>2</sub>O molecules in the CdTe/B<sub>4</sub>C<sub>3</sub>-V heterostructure.

Table S2 Adsorption energy of water molecules at different adsorption sites.

| Structure | $E(\text{B}_4\text{C}_3/\text{CdTe})/\text{eV}$ | $E(\text{H}_2\text{O})/\text{eV}$ | $E(\text{B}_4\text{C}_3/\text{CdTe}-\text{H}_2\text{O})/\text{eV}$ | $E_{\text{ads}}(\text{eV})$ |
|-----------|-------------------------------------------------|-----------------------------------|--------------------------------------------------------------------|-----------------------------|
| 1         | -57.77                                          | -14.22                            | -72.40                                                             | -0.41                       |
| 2         | -57.77                                          | -14.22                            | -72.40                                                             | -0.41                       |
| 3         | -57.77                                          | -14.22                            | -72.38                                                             | -0.39                       |
| 4         | -57.77                                          | -14.22                            | -72.38                                                             | -0.39                       |
| 5         | -57.77                                          | -14.22                            | -72.18                                                             | -0.19                       |
| 6         | -57.77                                          | -14.22                            | -72.38                                                             | -0.39                       |
| 7         | -57.77                                          | -14.22                            | -72.38                                                             | -0.39                       |
| 8         | -57.77                                          | -14.22                            | -72.38                                                             | -0.39                       |
| 9         | -57.77                                          | -14.22                            | -72.38                                                             | -0.39                       |
| 10        | -57.77                                          | -14.22                            | -72.33                                                             | -0.34                       |
| 11        | -57.77                                          | -14.22                            | -72.39                                                             | -0.40                       |

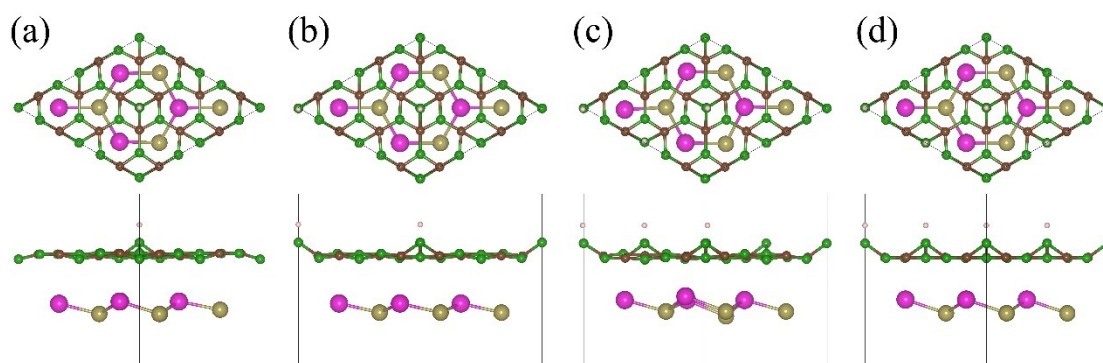

Figure S3 (a), (b), (c) and (d) The optimized structures for different hydrogen coverage on the  $\text{B}_4\text{C}_3$  layer in the  $\text{CdTe}/\text{B}_4\text{C}_3\text{-V}$  heterostructures.

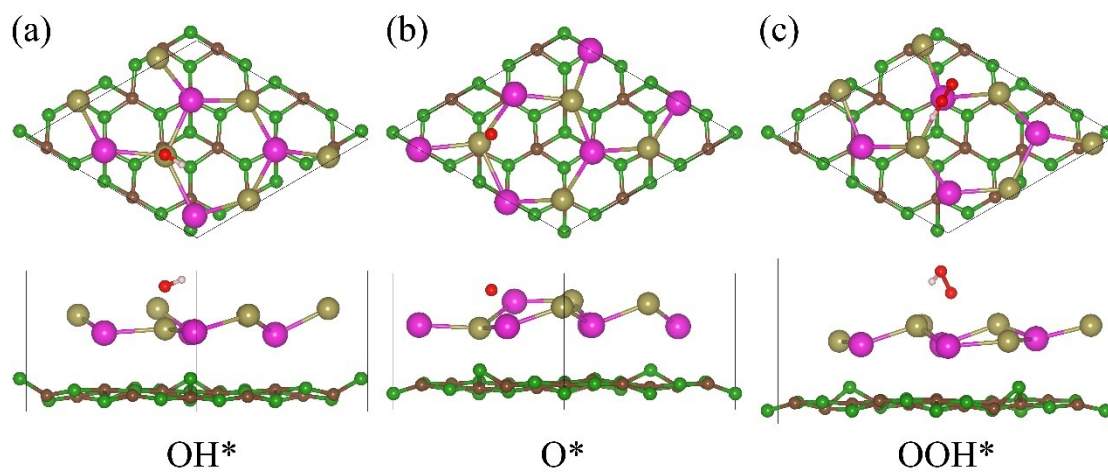

Figure S4 The optimized structures for (a) OH\*, (b) O\* and (c) OOH\* intermediates.
